# Supplementary material for: Enhancing orange-red emission by doping/codoping CsPb2Br5 with cations through a room-temperature aqueous-phase synthesis
Source: Royal Society of Chemistry journal article supplement (doi:10.1039/d4ce00593g), 2024-01-01
Supplement: d4ce00593g1.pdf [file d4ce00593g1.pdf]

## Supporting Information

### **Enhancing Orange-red Emission by Doping/codoping CsPb<sub>2</sub>Br<sub>5</sub> with Cations through a Room-temperature Aqueous-phase Synthesis**

Yuwei Zhong<sup>a</sup>, Xinran Li<sup>a</sup>, Hao Zhang<sup>a</sup>, Rong Zhang<sup>a</sup>, Kaiwen Hu<sup>a,\*</sup>, Xuedong Zhou<sup>a</sup>, Yi Xie<sup>a,\*</sup>

<sup>a</sup> *State Key Laboratory of Silicate Materials for Architectures, Wuhan University of Technology,  
No. 122, Luoshi Road, Wuhan 430070, P. R. China.*

*Email: xiey@whut.edu.cn*

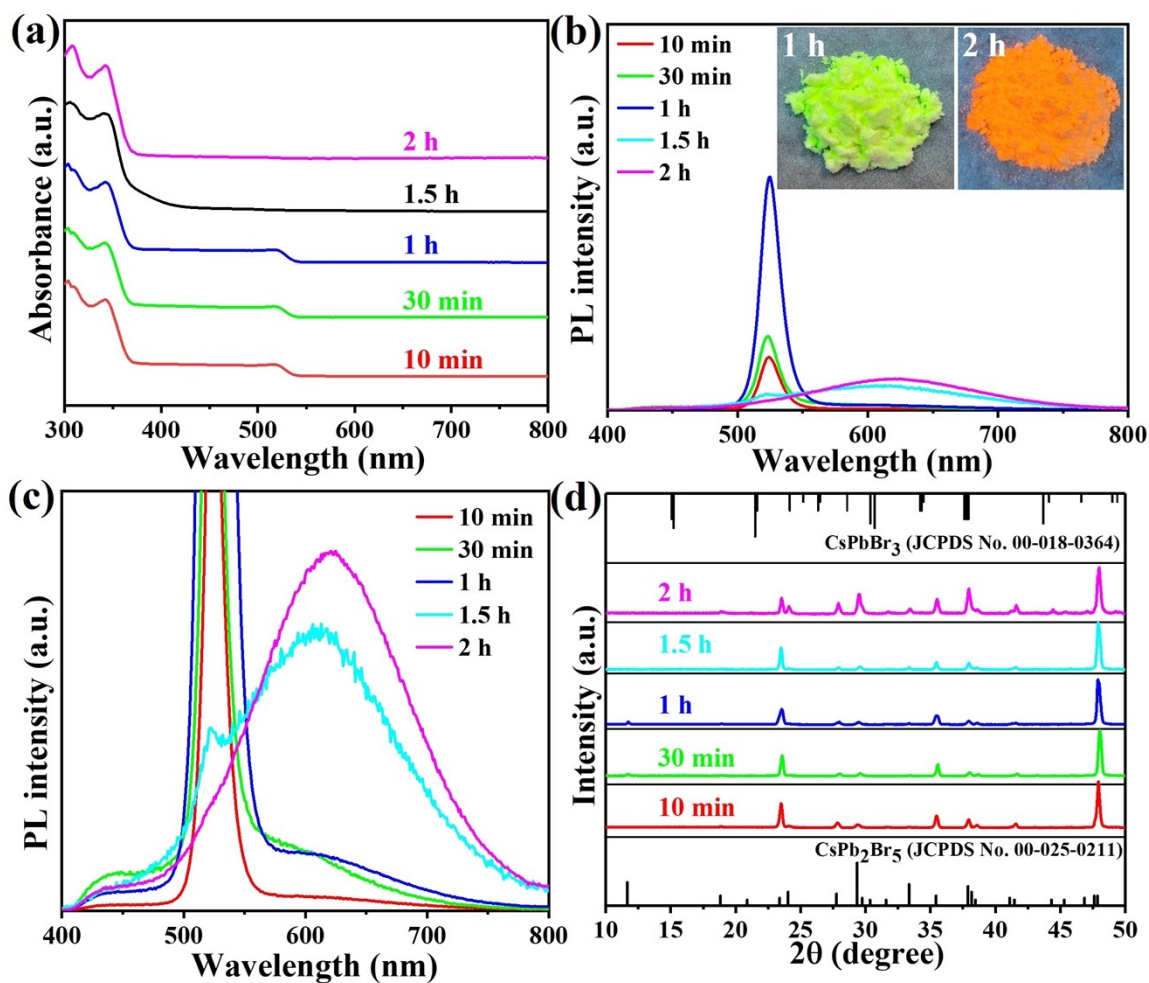

**Fig. S1** (a) UV-visible diffuse reflectance spectra, (b) PL spectra and (c) corresponding magnified view of the PL spectra, and (d) XRD patterns of the undoped Cs-Pb-Br samples achieved at different reaction time. Insets in panel b) provide the digital photographs of the related powder samples under UV irradiation.

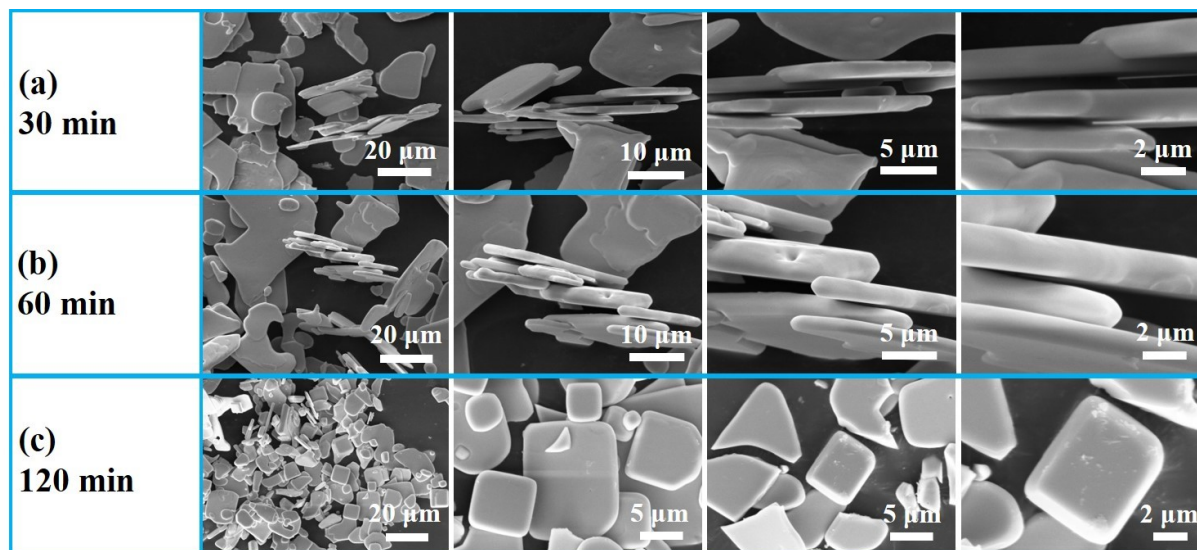

**Fig. S2** SEM images with different magnifications of the typical undoped CsPb<sub>2</sub>Br<sub>5</sub> achieved by room-temperature aqueous phase reaction for different time as dictated.

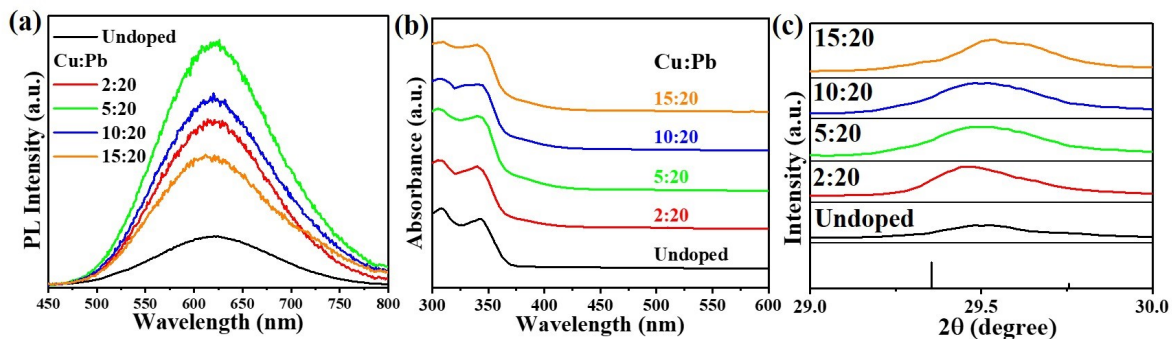

**Fig. S3** (a) PL spectra, (b) UV-visible diffuse reflectance spectra, and (c) enlarged XRD patterns of the typical undoped  $\text{CsPb}_2\text{Br}_5$  and various Cu-doped  $\text{CsPb}_2\text{Br}_5$  samples collected in the presence of different amounts of Cu-precursor (denoted as precursor molar ratio of Cu:Pb). For comparison, PL and UV-visible diffuse reflectance spectra of the undoped  $\text{CsPb}_2\text{Br}_5$  (i.e., 0% Cu) are also provided.

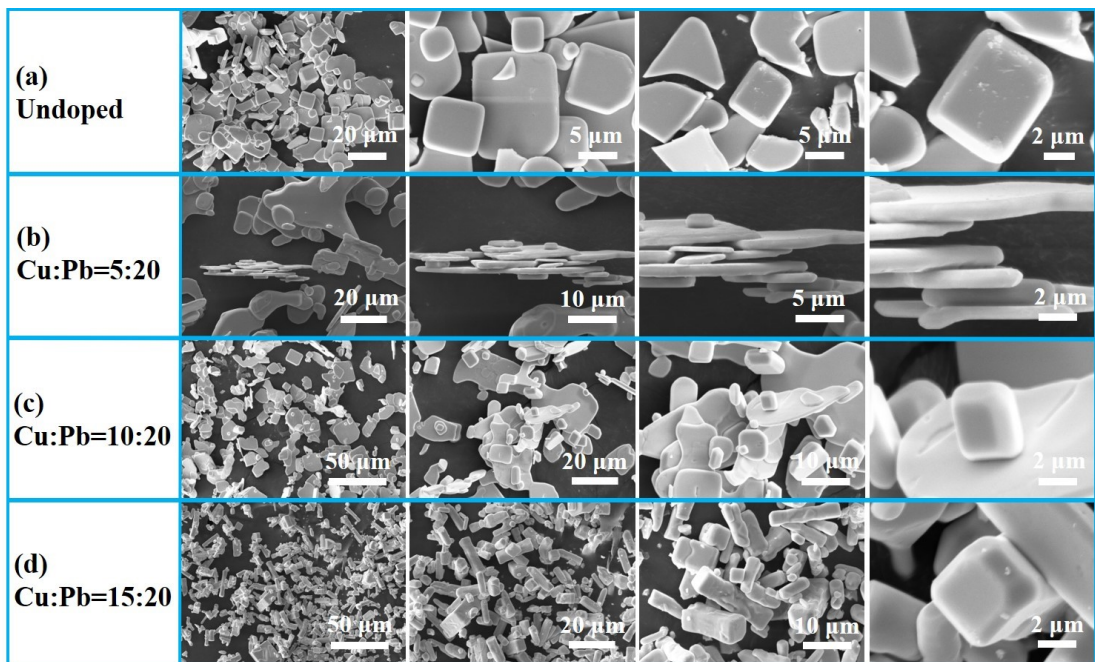

**Fig. S4** SEM with different magnifications of the representative Cu-doped  $\text{CsPb}_2\text{Br}_5$  collected in the presence of different amounts of Cu-precursors (denoted as precursor molar ratio of Cu:Pb). For comparison, SEM images of the undoped  $\text{CsPb}_2\text{Br}_5$  (i.e., 0% Cu) are also provided.

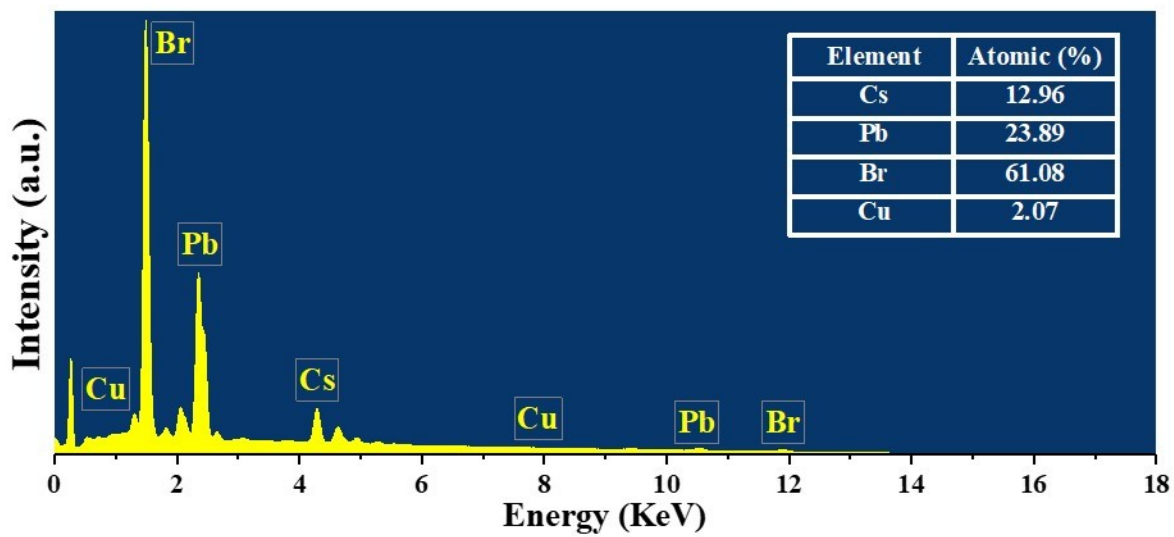

Fig. S5 EDS spectrum and element analysis on the typical Cu-doped CsPb<sub>2</sub>Br<sub>5</sub>.

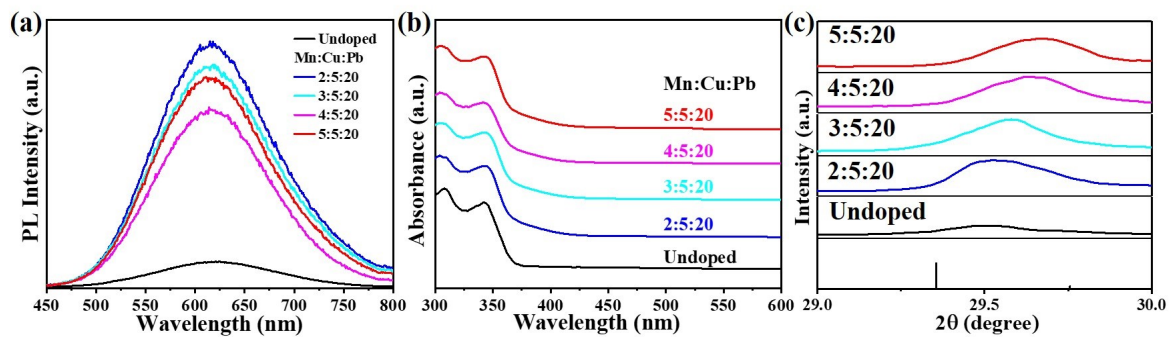

**Fig. S6** PL spectra (a), UV-visible diffuse reflectance spectra (b), and enlarged view of the XRD patterns (c) of the Cu-Mn-codoped  $\text{CsPb}_2\text{Br}_5$  collected in the presence of different amounts of Mn-precursors (denoted as precursor molar ratio of Mn:Cu:Pb).

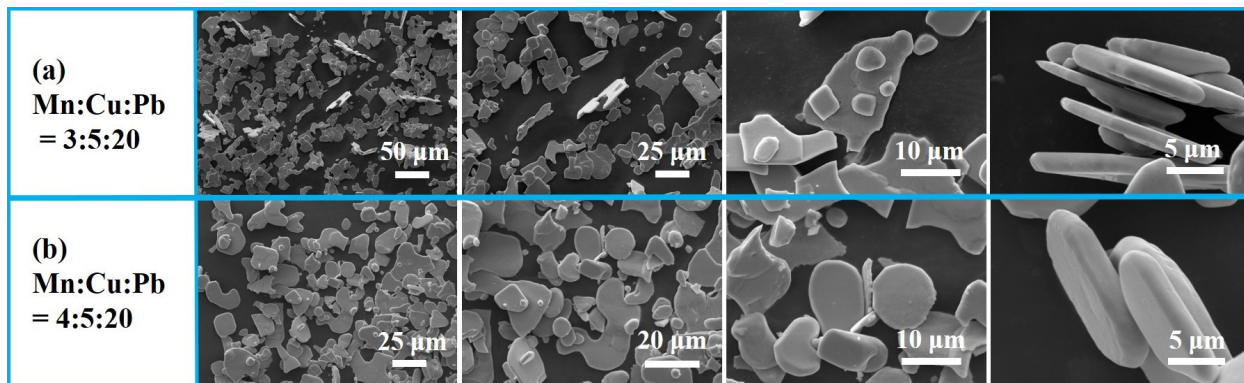

**Fig. S7** SEM images with different magnifications of the Cu-Mn-codoped  $\text{CsPb}_2\text{Br}_5$  collected in the presence of different amounts of Mn-precursors (denoted as precursor molar ratio of Mn:Cu:Pb).



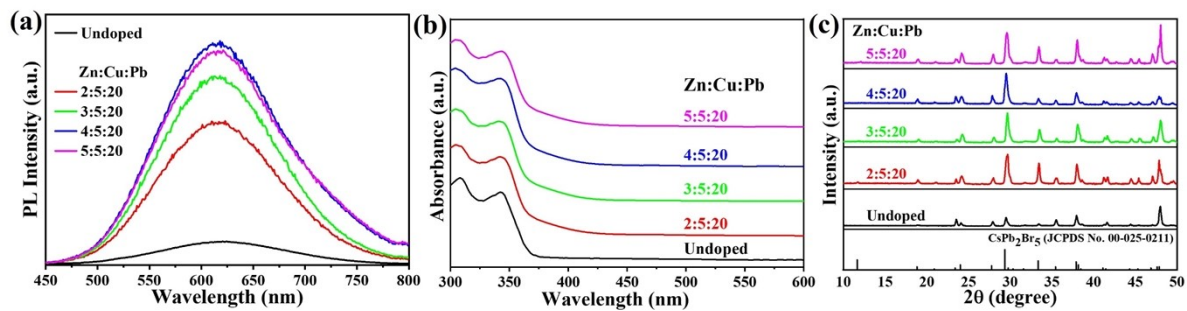

**Fig. S8** PL spectra (a), UV-visible diffuse reflectance spectra (b), and XRD patterns (c) of the Cu-Zn-codoped  $\text{CsPb}_2\text{Br}_5$  collected in the presence of different amounts of Zn-precursors (denoted as precursor molar ratio of Zn:Cu:Pb).

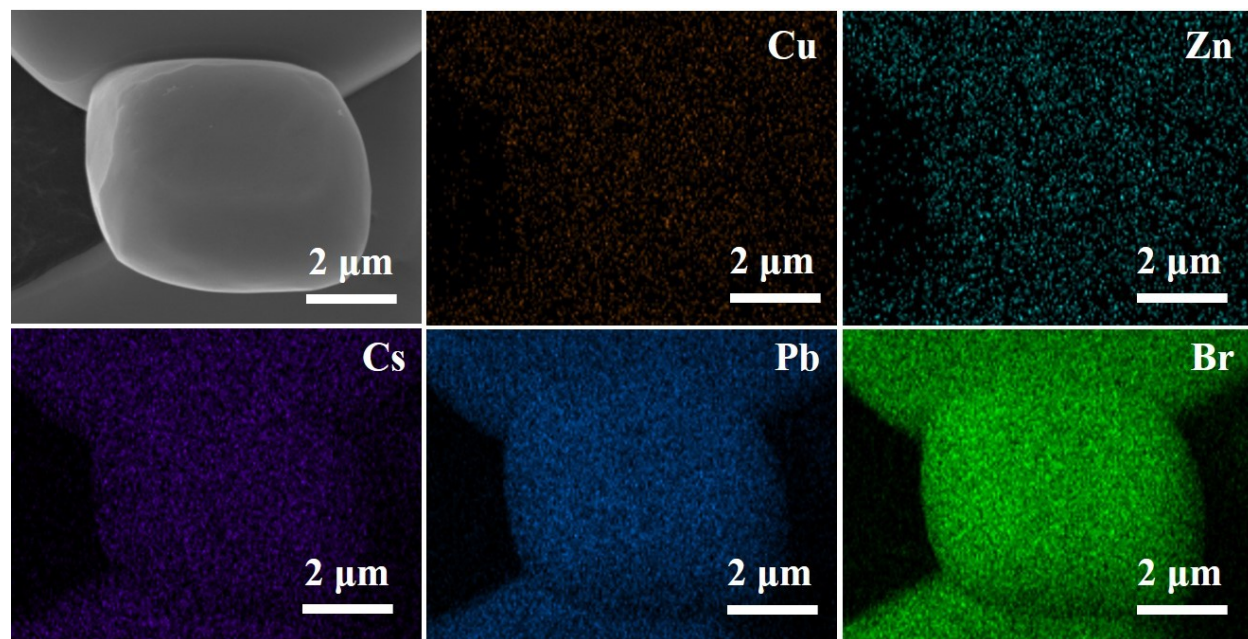

**Fig. S9** Elemental mapping of the representative Cu-Zn-codoped  $\text{CsPb}_2\text{Br}_5$  sample.

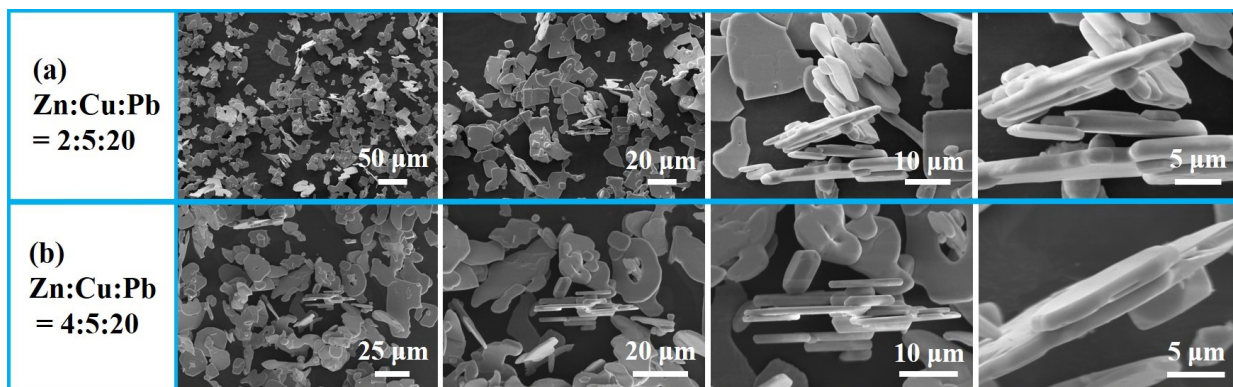

**Fig. S10** SEM images with different magnifications of the Cu-Zn-codoped CsPb<sub>2</sub>Br<sub>5</sub> collected in the presence of different amounts of Zn-precursors (denoted as precursor molar ratio of Zn:Cu:Pb).

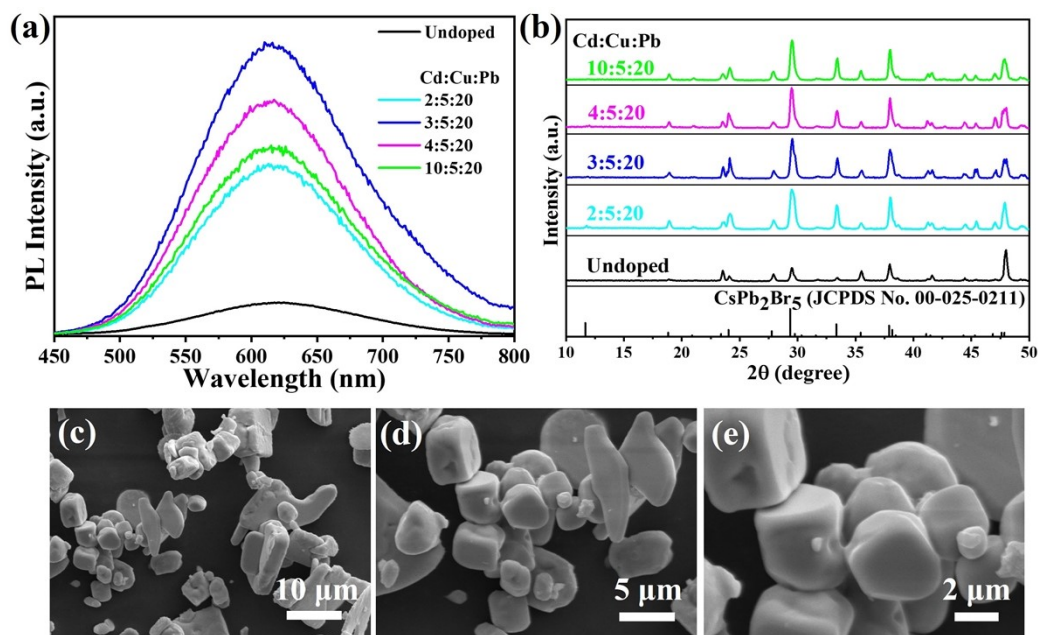

**Fig. S11** (a-b) PL spectra (a) and XRD patterns (b) of the Cu-Cd-codoped CsPb<sub>2</sub>Br<sub>5</sub> collected in the presence of different amounts of Cd-precursors (denoted as precursor molar ratio of Cd:Cu:Pb). (c-e) SEM images with different magnifications of the typical Cu-Cd-codoped CsPb<sub>2</sub>Br<sub>5</sub> sample.

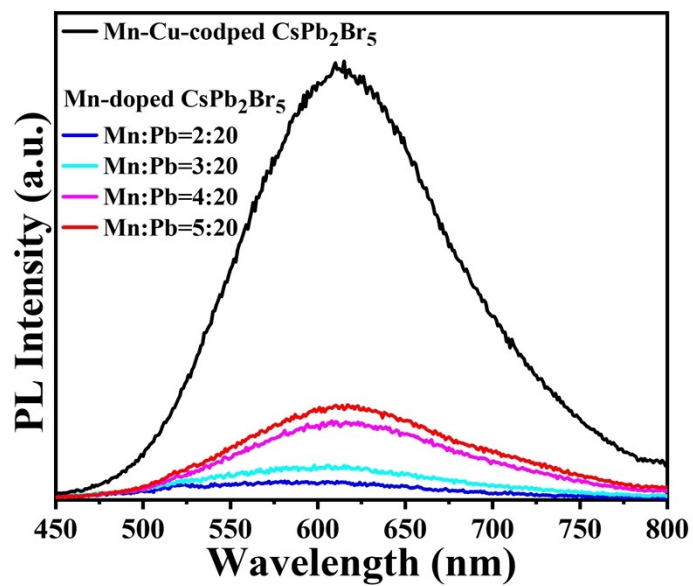

**Fig. S12** PL spectra the Cu-Mn-codoped CsPb<sub>2</sub>Br<sub>5</sub> (black curve) and Mn-doped CsPb<sub>2</sub>Br<sub>5</sub> collected in the presence of different Mn amounts in the precursors (denoted as precursor molar ratio of Mn:Pb).

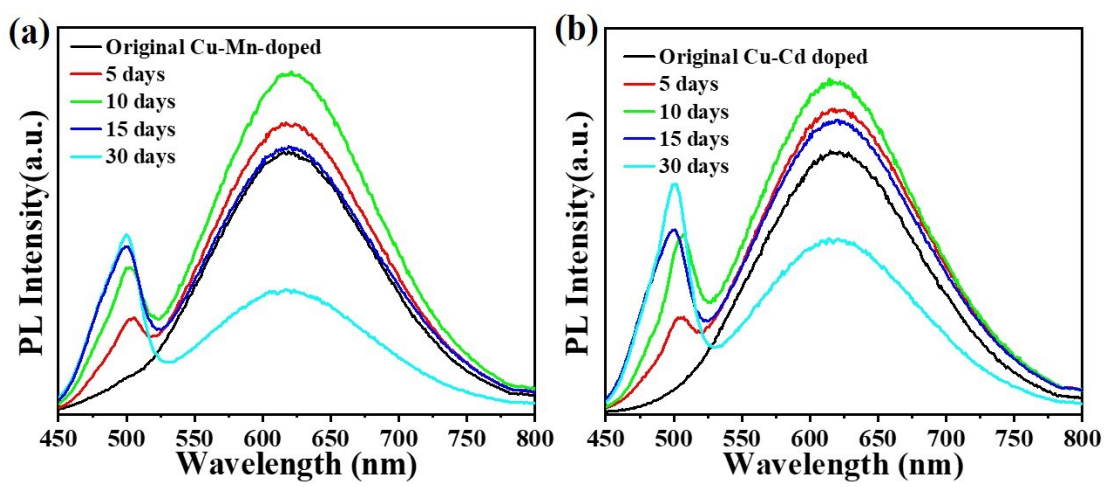

**Fig. S13** PL spectra of the representative Cu-Mn-codoped CsPb<sub>2</sub>Br<sub>5</sub> (a), and Cu-Cd-codoped CsPb<sub>2</sub>Br<sub>5</sub> (b) collected after immersing in water for different time.

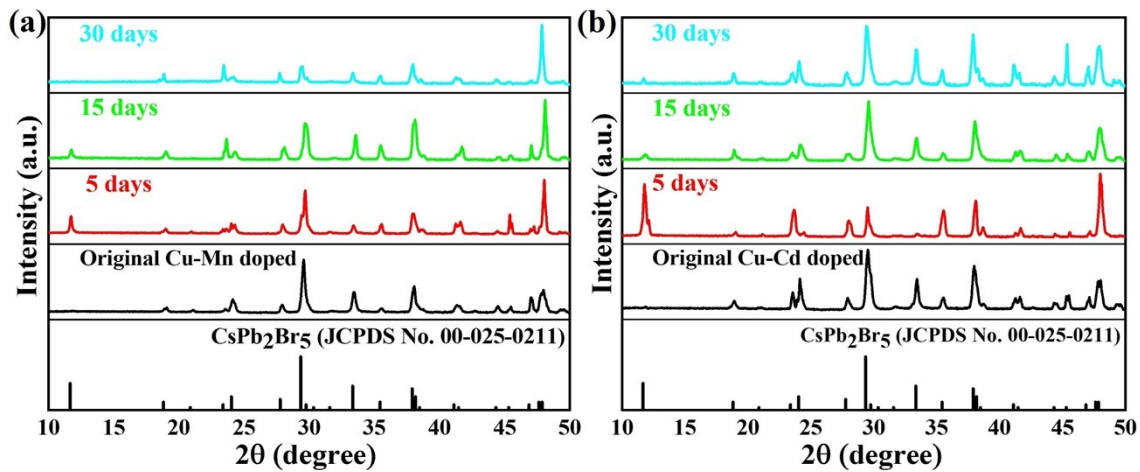

**Fig. S14** (a-c) Evolution of XRD patterns of the representative Cu-Mn-codoped CsPb<sub>2</sub>Br<sub>5</sub> (a), and Cu-Cd-codoped CsPb<sub>2</sub>Br<sub>5</sub> (b) before immersing and after immersing in water for different time.

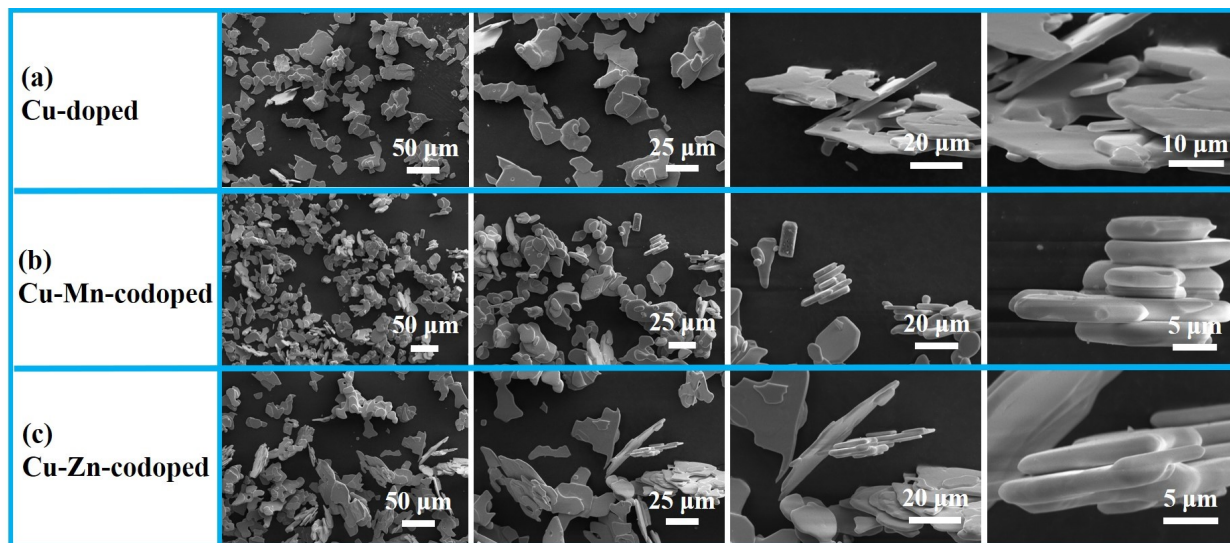

**Fig. S15** SEM images with different magnifications of the Cu-doped  $\text{CsPb}_2\text{Br}_5$  (a), and Cu-Mn-codoped  $\text{CsPb}_2\text{Br}_5$  (b), and Cu-Zn-codoped  $\text{CsPb}_2\text{Br}_5$  (c) immersed in water for 5 days.



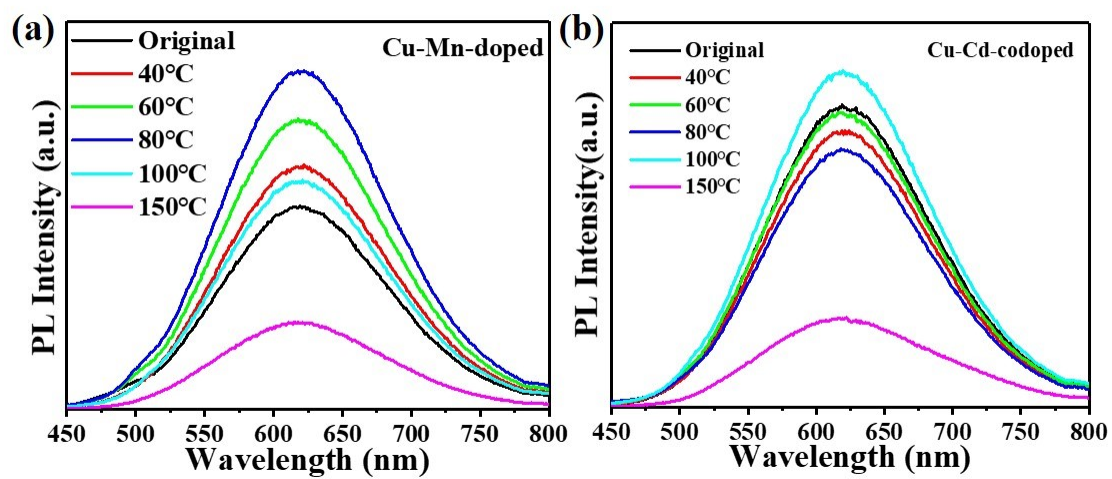

**Fig. S16** Evolution of PL spectra of the representative Cu-Mn-codoped CsPb<sub>2</sub>Br<sub>5</sub> (a), and Cu-Cd-codoped CsPb<sub>2</sub>Br<sub>5</sub> (b) treated at different temperatures for 2 h.

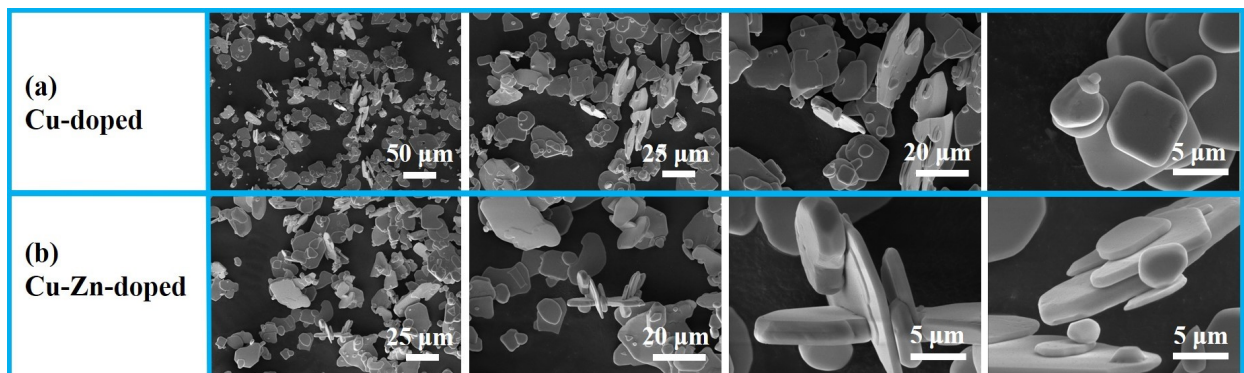

**Fig. S17** SEM images with different magnifications of the Cu-doped CsPb<sub>2</sub>Br<sub>5</sub> and Cu-Zn-codoped CsPb<sub>2</sub>Br<sub>5</sub> annealed at 60°C for 2 h.

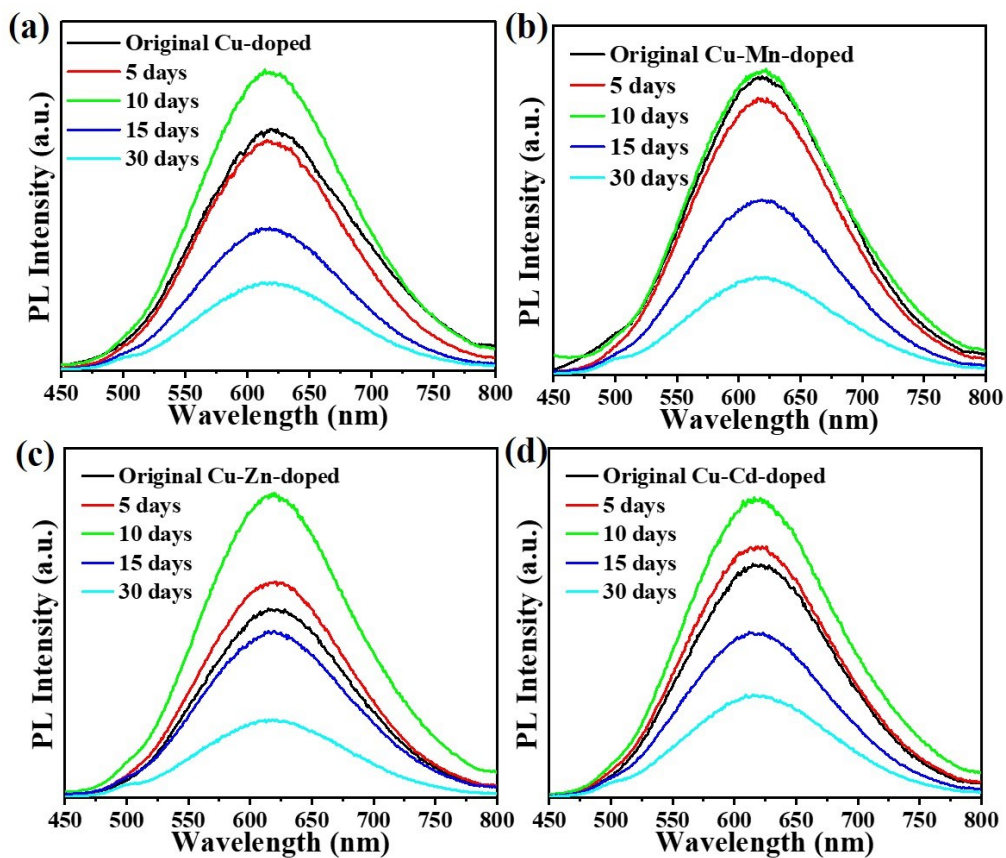

**Fig. S18** Evolution of PL spectra of the representative Cu-doped  $\text{CsPb}_2\text{Br}_5$  (a), and Cu-Mn-codoped  $\text{CsPb}_2\text{Br}_5$  (b), Cu-Zn-codoped  $\text{CsPb}_2\text{Br}_5$  (c), and Cu-Cd-codoped  $\text{CsPb}_2\text{Br}_5$  (d) over exposing time under ambient condition.
